# Supplementary material for: Ambulatory COVID-19 Patients Treated with Lactoferrin as a Supplementary Antiviral Agent: A Preliminary Study
Source: MDPI journal article supplement (doi:10.3390/jcm10184276), 2021-09-21
Supplement: s1 [file s1]

# Supplementary Materials

**Table S1.** Burden of comorbidities by treatment groups.

| Type of Comorbidity                               | Patients Treated<br>with bLf ( <i>n</i> = 82) | Patients Untreated<br>with bLf ( <i>n</i> = 39) | <i>p</i> -Value |
|---------------------------------------------------|-----------------------------------------------|-------------------------------------------------|-----------------|
| Overweight/obesity, <i>n</i> .                    | 7                                             | 3                                               | 1.00            |
| Human immunodeficiency virus<br>(HIV), <i>n</i> . | 0                                             | 2                                               | 0.10            |
| Arthritis/ rheumatic disease, <i>n</i> .          | 2                                             | 0                                               | 1.00            |
| Asthma, <i>n</i> .                                | 3                                             | 2                                               | 0.66            |
| BPCO/Chronic bronchitis, <i>n</i> .               | 2                                             | 0                                               | 1.00            |
| Hypertension, <i>n</i> .                          | 11                                            | 6                                               | 0.77            |
| Diabetes, <i>n</i> .                              | 4                                             | 3                                               | 0.68            |
| Cardiomyopathy, <i>n</i> .                        | 3                                             | 0                                               | 0.55            |
| Atrial fibrillation, <i>n</i> .                   | 1                                             | 0                                               | 1.00            |
| Cardiovascular disease, <i>n</i> .                | 3                                             | 2                                               | 0.66            |

BPCO = Chronic obstructive pulmonary disease; bLf = bovine lactoferrin.
